# Supplementary material for: Historical reconstruction of climatic and elevation preferences and the evolution of cloud forest-adapted tree ferns in Mesoamerica
Source: PeerJ journal article supplement (doi:10.7717/peerj.2696), 2016-11-16

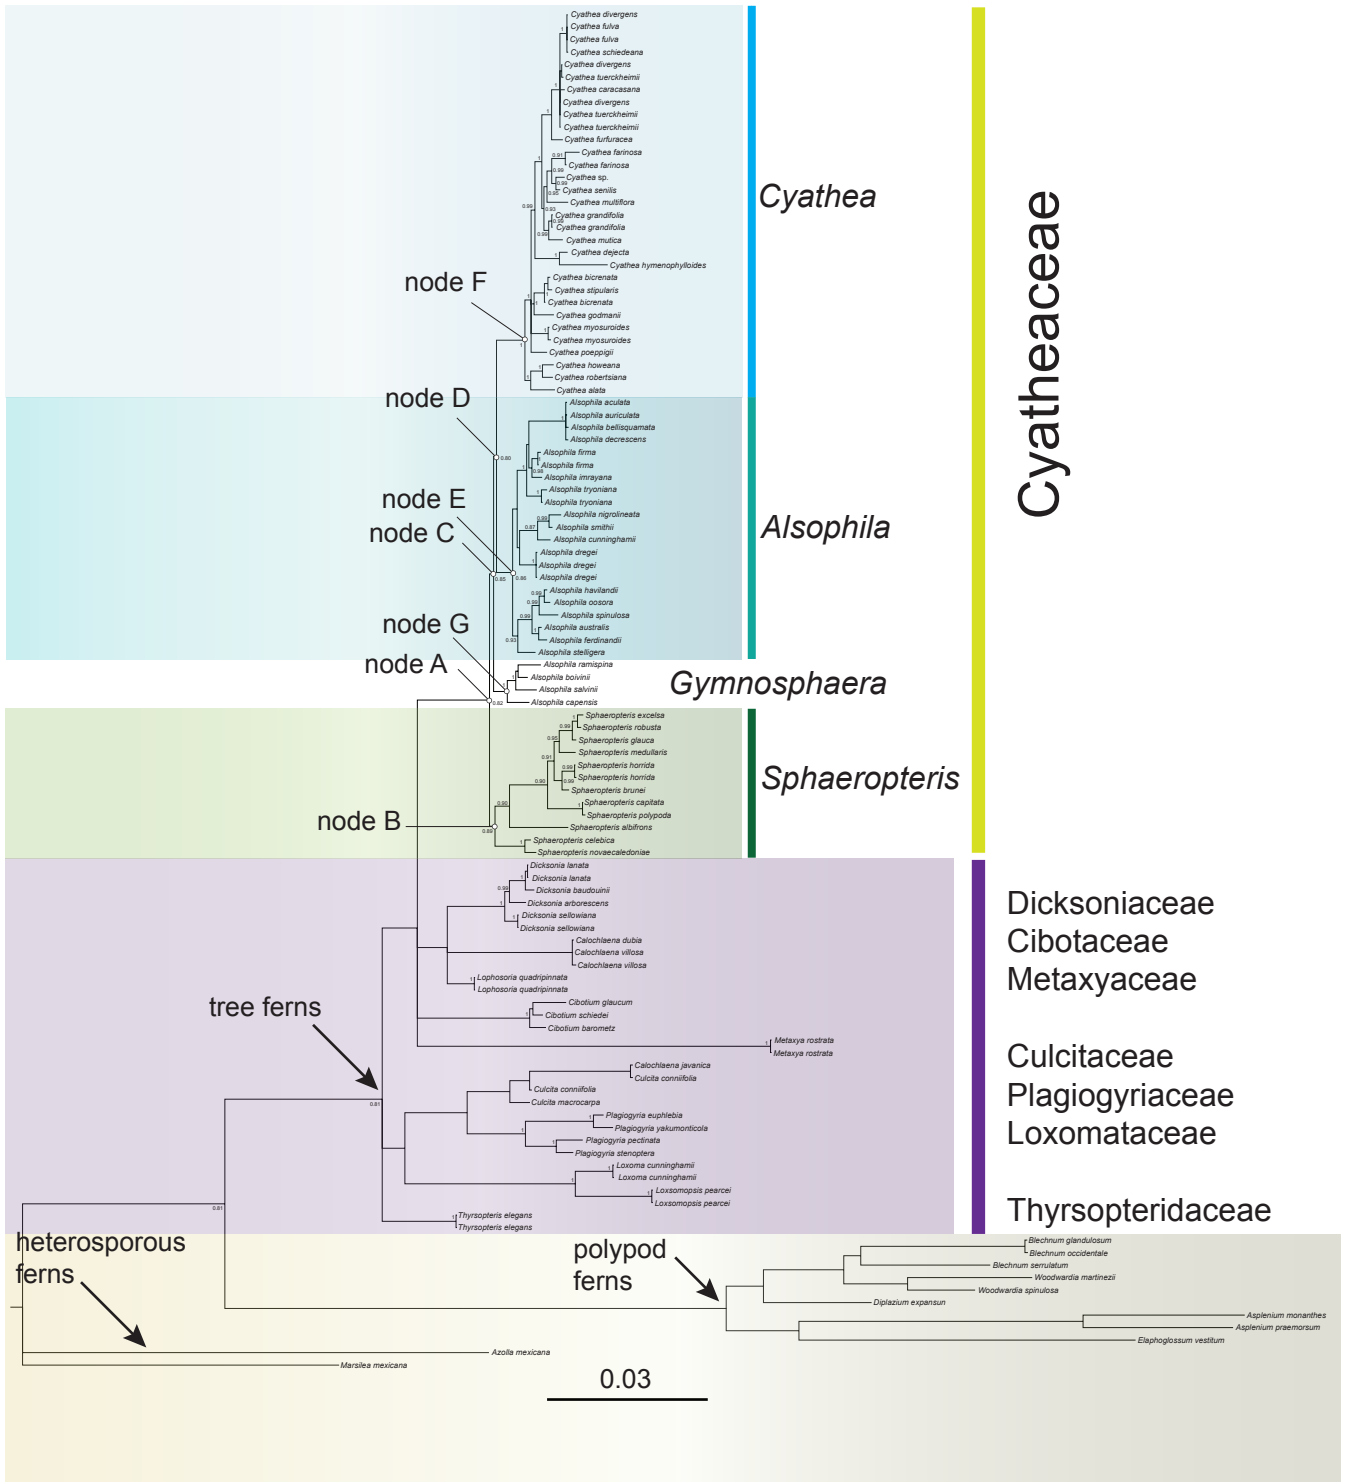

Supplement: FigS1R1.pdf [file FigS1R1.pdf]
